# Supplementary material for: Novel insights into breast cancer copy number genetic heterogeneity revealed by single-cell genome sequencing
Source: eLife. 2020 May 13;9:e51480. doi: 10.7554/eLife.51480 (PMC7220379; doi:10.7554/eLife.51480)
Supplement: Source code 1. [file elife-51480-code1.r]

data.choice = "5k"
min.num.copy.num.states.1 = 2
min.num.copy.num.states.2 = 3
min.perc.threshold = 10
min.num.bins = 3
all.data.set <- c("P22")
all.file.names <- paste(all.data.set,".CNA.calls.",data.choice,".seg.quantal.primary.txt",sep="")

for(index in c(1:length(all.data.set))) {
  current.data <- read.table(file = all.file.names[index],header = TRUE,fill=TRUE)
  df <- current.data[,-c(1,2,3)]
   z <- as.matrix(df)
  if (index==1) {
    subclonality.data <- current.data[,c(1,2,3)]
    subclonality.data <- cbind(subclonality.data,c(1:nrow(subclonality.data)))
    names(subclonality.data)[ncol(subclonality.data)] = "Bin"
  }
  copy_num_states <- round(z)
  num_col = ncol(copy_num_states)
  selected_columns_num = min(62,num_col)
  selected_columns <- sample(c(1:num_col),selected_columns_num,replace=FALSE)
  copy_num_states <- copy_num_states[,selected_columns]
  all.copy.num.states <- {}
  for(i in c(1:nrow(copy_num_states))) {
    all.copy.num.states <- unique(c(all.copy.num.states,unique(copy_num_states [i,])))
  }
  all.copy.num.states <- sort(all.copy.num.states)
  subcl.bin.indicator.states.1 <- rep(0,nrow(copy_num_states))
  subcl.bin.indicator.states.2 <- rep(0,nrow(copy_num_states))
  cns.distribution.vector <- {}
  for(i in c(1:nrow(copy_num_states))) {
    current.bin.copy.num.states <- copy_num_states [i,]
    current.bin.unique.copy.num.states <- unique(current.bin.copy.num.states)
    current.bin.copy.num.frequencies <- table(current.bin.copy.num.states)
    current.bin.copy.num.perc.frequencies <- 100*current.bin.copy.num.frequencies/ncol(z)
    if(length(which(current.bin.copy.num.perc.frequencies >= min.perc.threshold)) >= min.num.copy.num.states.1) {
      subcl.bin.indicator.states.1[i] = 1
    }
    if(length(which(current.bin.copy.num.perc.frequencies >= min.perc.threshold)) >= min.num.copy.num.states.2) {
      subcl.bin.indicator.states.2[i] = 1
    }
    cns.distribution <- paste(names(current.bin.copy.num.perc.frequencies),as.character(round(current.bin.copy.num.perc.frequencies,2)),sep="_")
    cns.distribution <-paste(cns.distribution,collapse="X")
    cns.distribution.vector <- c(cns.distribution.vector,cns.distribution)
  }
  
  subclonality.data <- cbind(subclonality.data,subcl.bin.indicator.states.1)
  names(subclonality.data)[ncol(subclonality.data)] = paste(all.data.set[index],"_Min_Num_Distinct_CNS_",min.num.copy.num.states.1,"_Threshold_Perc_",min.perc.threshold,"_Bin_Indicator",sep="")
  subclonality.data <- cbind(subclonality.data,subcl.bin.indicator.states.2)
  names(subclonality.data)[ncol(subclonality.data)] = paste(all.data.set[index],"_Min_Num_Distinct_CNS_",min.num.copy.num.states.2,"_Threshold_Perc_",min.perc.threshold,"_Bin_Indicator",sep="")
  subclonality.data <- cbind(subclonality.data,cns.distribution.vector)
  names(subclonality.data)[ncol(subclonality.data)] = paste(all.data.set[index],"_CNS_Distribution",sep="")
  }

write.csv(subclonality.data,file = paste("subclonality_summary_table_new_",min.perc.threshold,"_perc_new_rev.csv",sep=""),row.names=FALSE)
